# Supplementary material for: Next-Generation Sequencing in Lung Cancers—A Single-Center Experience in Taiwan
Source: MDPI journal article supplement (doi:10.3390/medicina60020236), 2024-01-29
Supplement: s1 [file s1]

## Supplementary figure S1

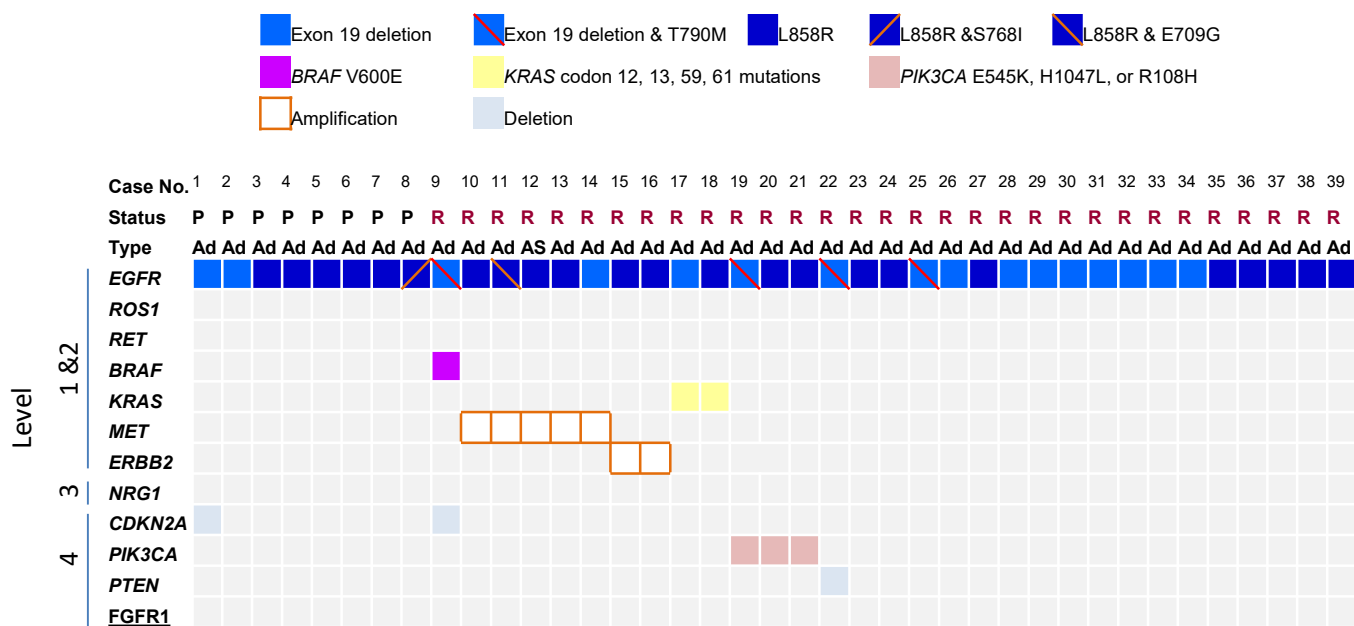

**Supplementary figure S1.** Genetic landscape of NSCLC with *EGFR* TKI mutations. R, progressive disease; P, primary disease; AS, adenosquamous carcinoma; Ad, adenocarcinoma.

# Supplementary figure S2

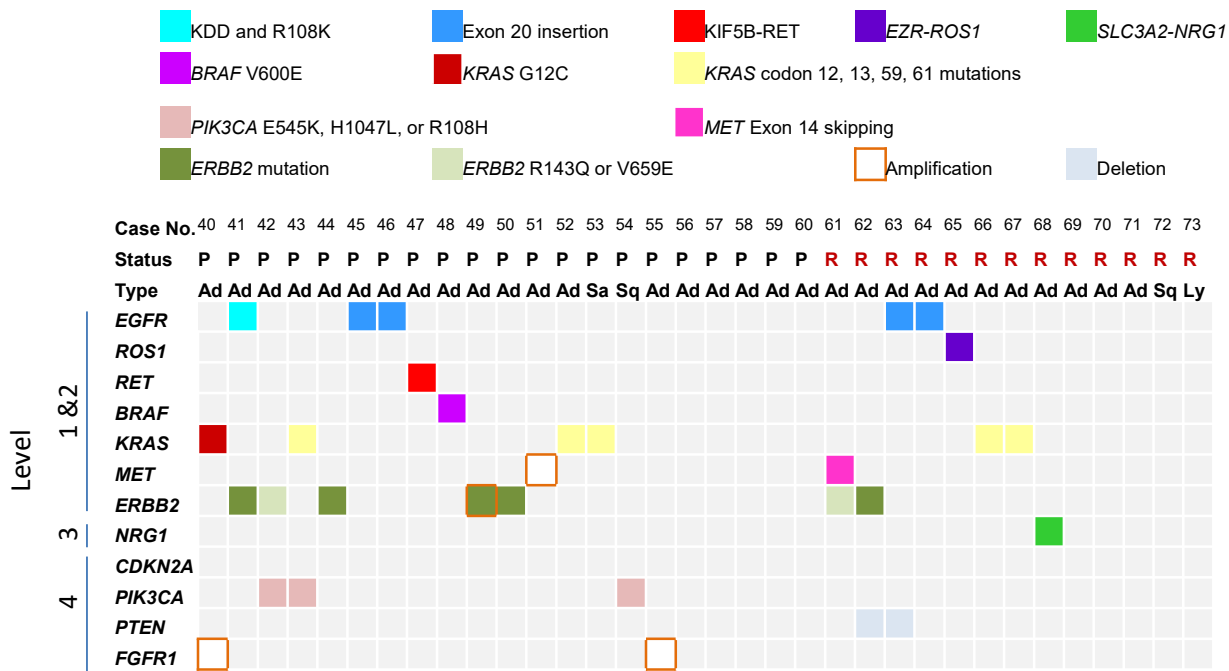

**Supplementary figure S2.** Genetic landscape of NSCLC without *EGFR* TKI mutations. R, progressive disease; P, primary disease; Ad, adenocarcinoma; Sa, sarcomatoid carcinoma; Sq, squamous cell carcinoma; Ly, lymphoepithelial carcinoma.
